# Supplementary material for: RNase L Cleavage Products Promote Switch from Autophagy to Apoptosis by Caspase-Mediated Cleavage of Beclin-1
Source: MDPI journal article supplement (doi:10.3390/ijms160817611), 2015-07-31
Supplement: s1 [file s1]

## Supplementary Information

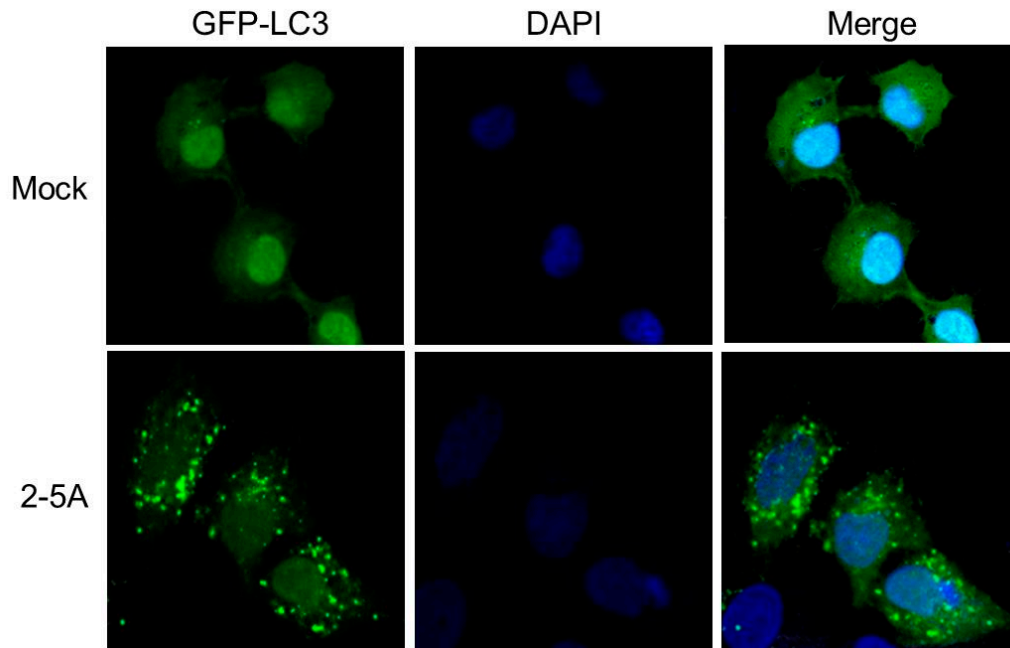

**Figure S1.** Formation of GFP-LC3 puncta in RNase L activated cells. HT1080 cells expressing GFP-LC3 were transfected with 10  $\mu$ M of 2–5A or mock transfected with transfection reagent and representative images of cells taken at 60 $\times$  magnification using confocal microscope are shown. Nuclei were stained with DAPI reagent.

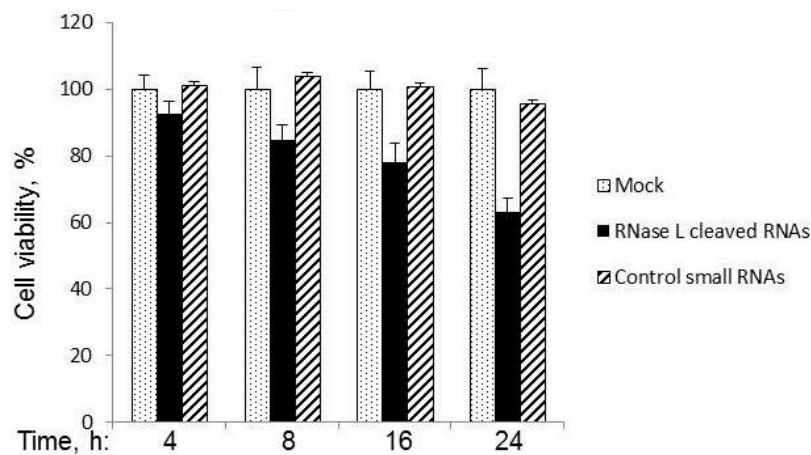

**Figure S2.** RNase L-cleaved RNAs induce apoptosis in HEK 293 cells which lack TLR expression. HEK293 cells were transfected with 2  $\mu$ g/mL of RNase L generated small RNAs or control RNAs (described in methods) for indicated times and cell viability was determined using MTT assay. Results are representative of experiments performed in triplicate  $\pm$  SD.
